# Supplementary material for: Detecting clinical medication errors with AI enabled wearable cameras
Source: PubMed Central journal article supplement — NPJ Digit Med. 2024 Oct 22;7:287. doi: 10.1038/s41746-024-01295-2 (PMC11496812; doi:10.1038/s41746-024-01295-2), 2024-10-22
Supplement: 41746_2024_1295_MOESM1_ESM.pdf [file 41746_2024_1295_MOESM1_ESM.pdf]

## **Detecting clinical medication errors with AI enabled wearable cameras**

Justin Chan<sup>1,2†</sup>, Solomon Nsumba<sup>3†</sup>, Mitchell Wortsman<sup>1</sup>,  
Achal Dave<sup>4</sup>, Ludwig Schmidt<sup>1</sup>, Shyamnath Gollakota<sup>1\*</sup>, Kelly Michaelson<sup>5\*</sup>

<sup>1</sup>Paul G. Allen School of Computer Science, University of Washington, Seattle, WA, USA

<sup>2</sup>School of Computer Science, Carnegie Mellon University, Pittsburgh, PA, USA

<sup>3</sup>Department of Computer Science, Makerere University, Kampala, Uganda

<sup>4</sup>Toyota Research Institute, Los Altos, CA, USA

<sup>5</sup>Department of Anesthesiology & Pain Medicine, University of Washington, Seattle, WA, USA

<sup>†</sup>Equal contribution first authors

\*Corresponding authors: gshyam@cs.washington.edu, kellyem@uw.edu

### **Supplementary Materials**

Supplementary Fig. 1. Example drug labels at different resolutions.

Supplementary Fig. 2. Camera view from different positions and angles.

Supplementary Fig. 3. Different drug drawup scenarios in realworld operating room conditions.

Supplementary Fig. 4. Example images of syringe drug labels in the dataset.

Supplementary Fig. 5. Example images of vial drug labels in the dataset.

Supplementary Fig. 6. Example images of different vial labels styles for individual drugs in the dataset.

Supplementary Fig. 7. Drug label classification performance in controlled environment with vial swap events.

Supplementary Fig. 8. Vial swap detection results across real-world operating room and controlled environment.

Supplementary Fig. 9. Generalization of drug label classifier performance to unseen hospital operat-

ing room environment.

Supplementary Fig. 10. Cumulative distribution function of drug delivery duration.

Supplementary Table 1. Distribution of syringe drug labels in real-world operating room dataset and classifier training dataset.

Supplementary Table 2. Distribution of vial drug labels in real-world operating room dataset and classifier training dataset.

Supplementary Table 3: Distribution of syringe classifier training dataset images between real-world operating room and the controlled environment.

Supplementary Table 4: Distribution of vial classifier training dataset images between real-world operating room and the controlled environment.

Supplementary Algorithm 1: Algorithm to classify drug label on syringe or vial.

Supplementary Algorithm 2: Algorithm to compute vial swap errors.

## Supplementary materials

| Video resolution            | Syringe drug label                                                                  | Vial drug label                                                                       |
|-----------------------------|-------------------------------------------------------------------------------------|---------------------------------------------------------------------------------------|
| 3840 x 2160<br>(Our system) |    |    |
| 1920 x 1080                 |   |   |
| 960 x 540                   |  |  |
| 480 x 270                   |  |  |

**Supplementary Figure 1 | Example drug labels at different resolutions.** Labels captured at resolutions lower than the 4K video resolution used by our system can be difficult to read and classify.

**a** Chest-mounted camera

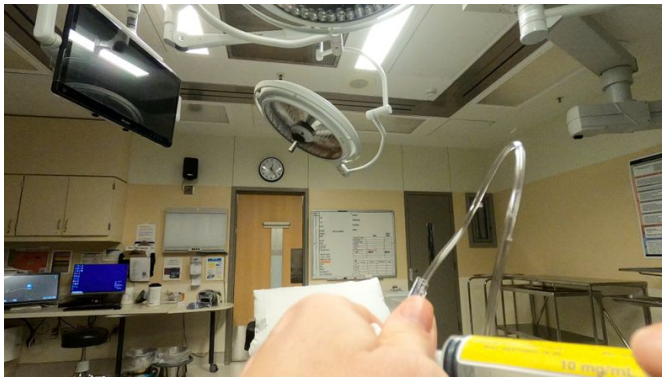

**b** Head-mounted camera tilted down

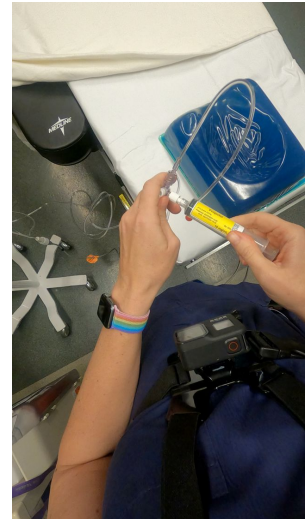

**c** Head-mounted camera facing straight

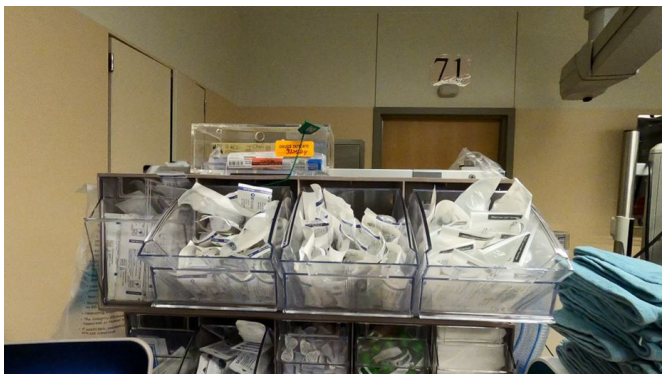

**d** Head-mounted camera tilted down

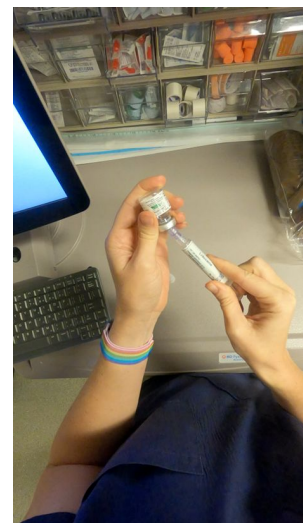

**Supplementary Figure 2 | Camera view from different positions and angles.** View of drug delivery event from **a**, chest-mounted camera and **b**, head-mounted camera tilted down. The head-mounted camera more reliably captures the drug label. View of a drug drawup event from head-mounted camera **c**, facing straight and **d**, tilted down. The drawup event is only visible when the camera is tilted down.



**a Drug drawup with gloves**

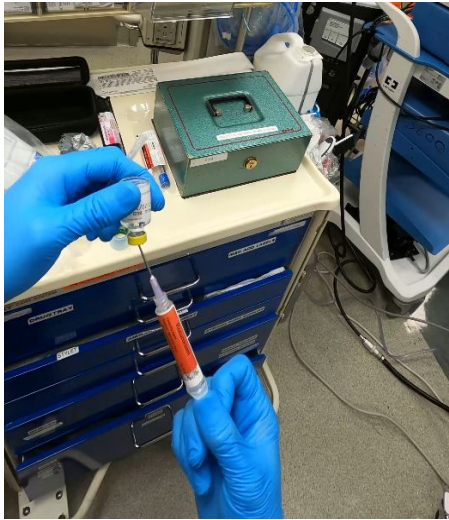

**Drug drawup without gloves**

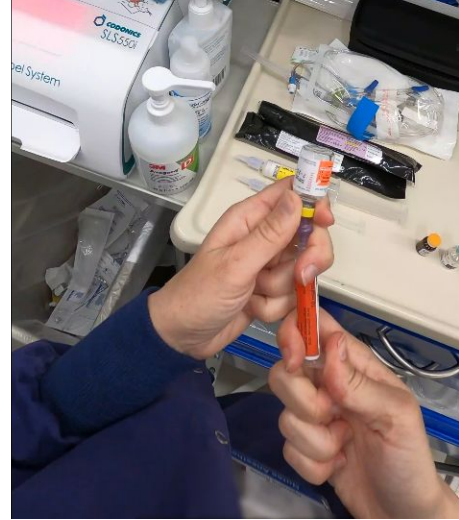

**b Syringes in background**

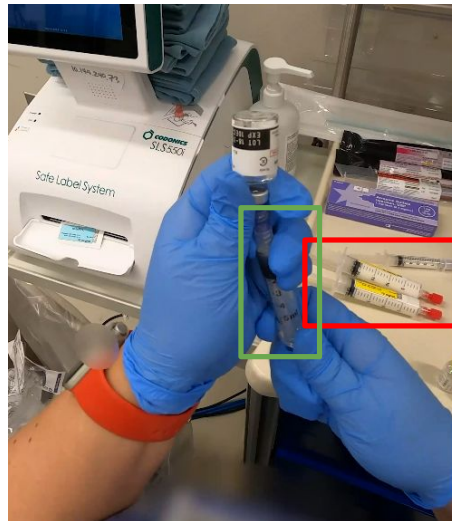

**Vials in background**

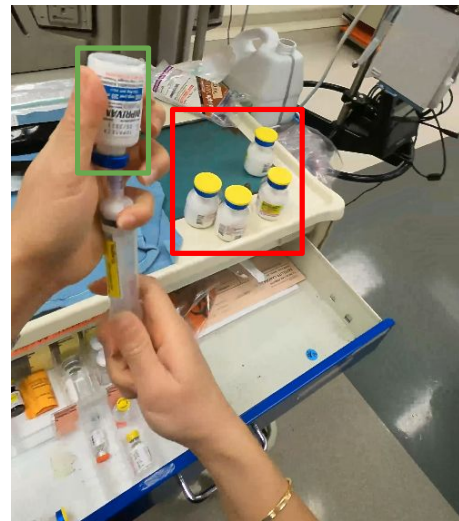

**Supplementary Figure 3 | Different drug drawup scenarios in realworld operating room conditions.** Drug drawups when **a**, provider is and is not wearing gloves **b**, syringes and vials are present in the background. Background syringes and vials are marked with a red bounding box, and the syringe and vial in hand is marked with a green bounding box.

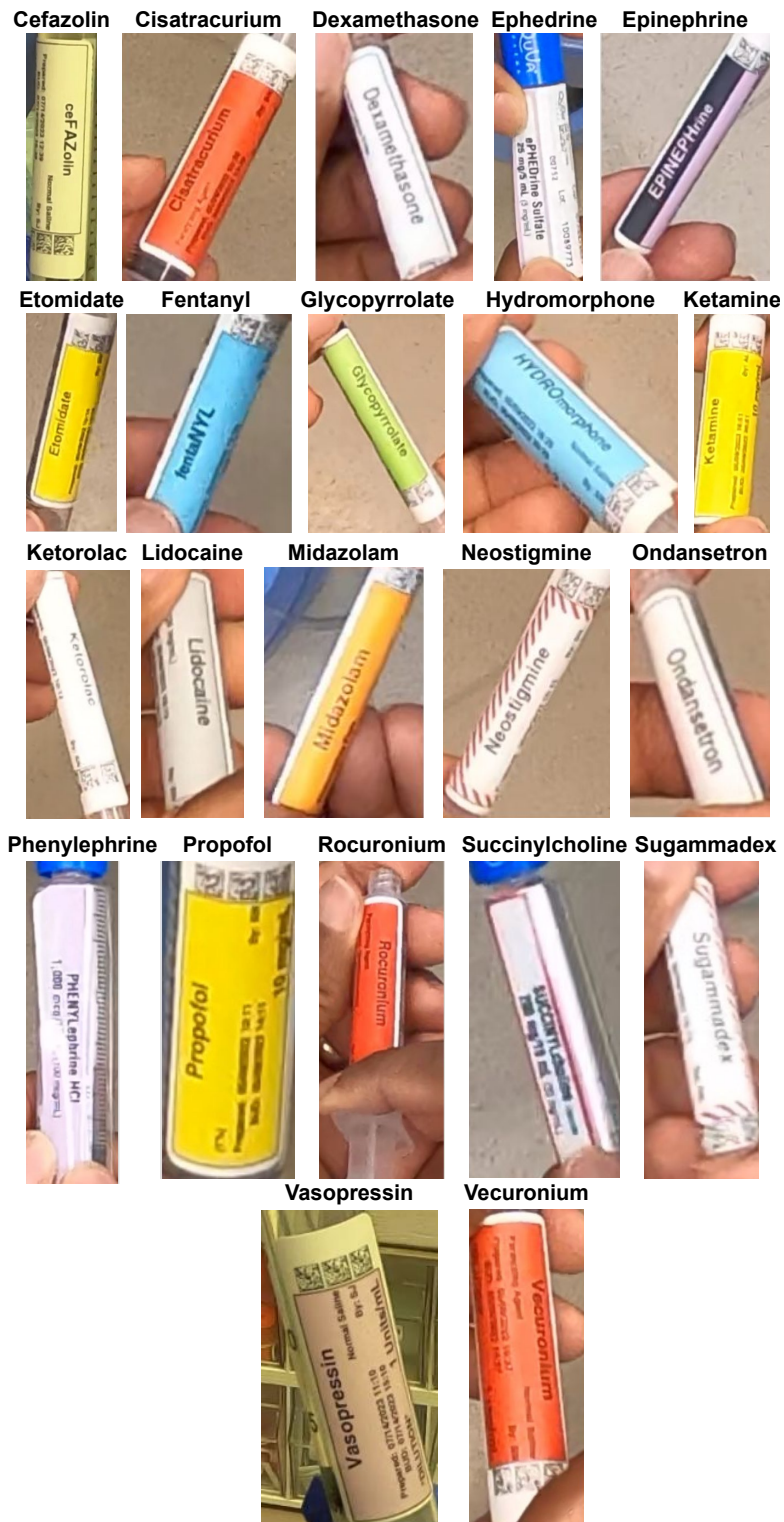

**Supplementary Figure 4 | Example images of syringe drug labels in the dataset.** Labels have different background colors, design layouts, lettering styles, and font choices.

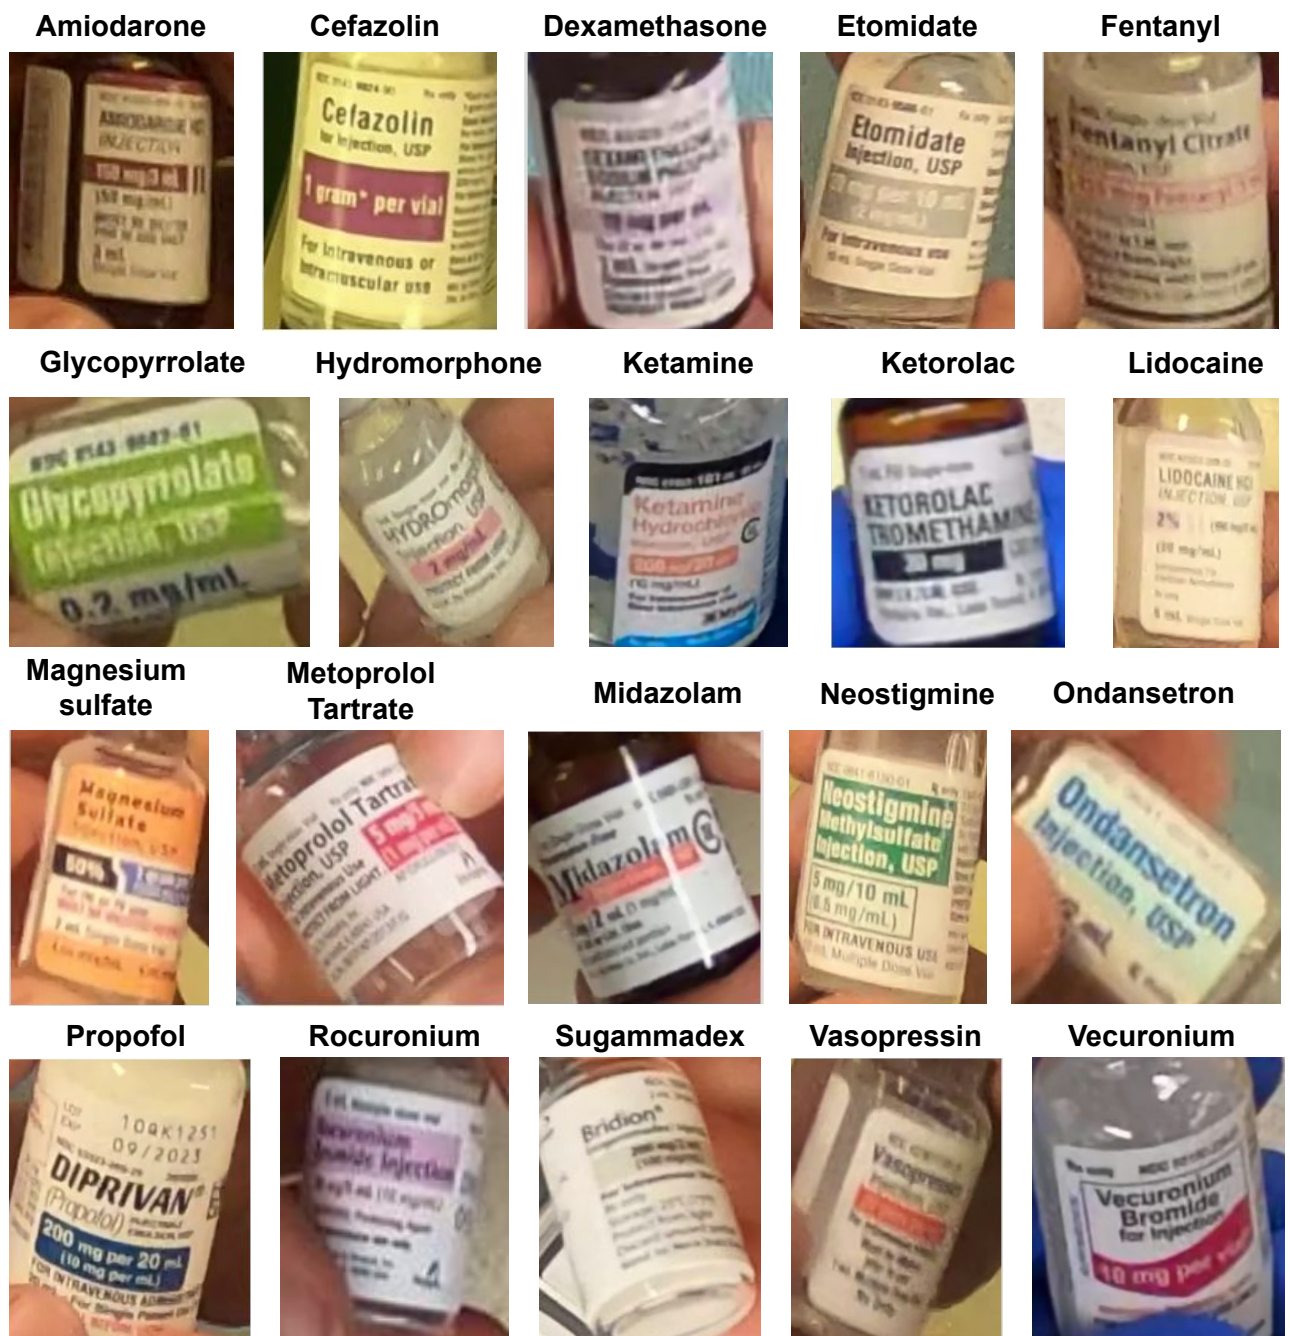

**Supplementary Figure 5 | Example images of vial drug labels in the dataset.** Labels span a variety of different background colors, design layouts, and font choices.



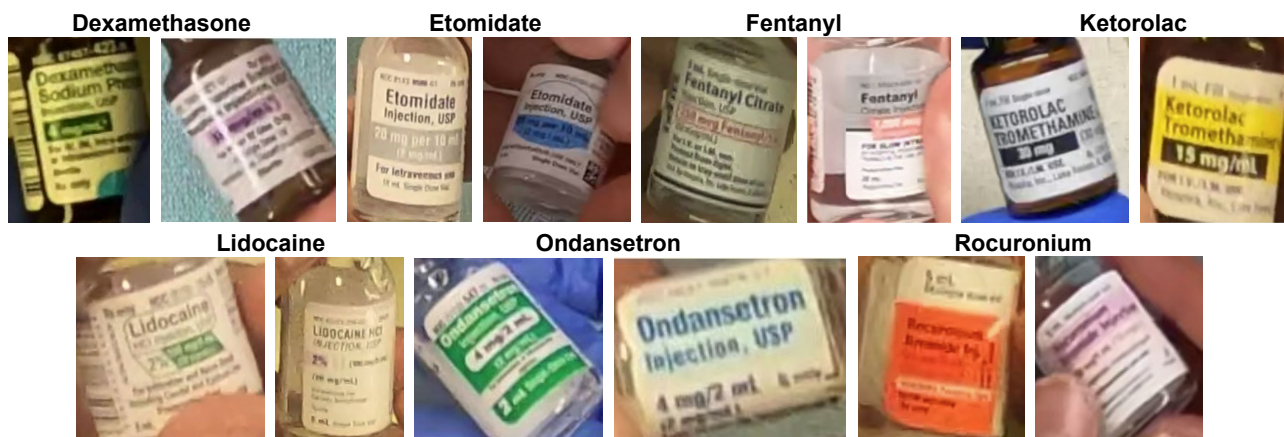

**Supplementary Figure 6 | Example images of different vial labels styles for individual drugs in the dataset.** The same drug can come in different vial shapes with different label designs. Labels can vary in dimension, background color, and font choice.



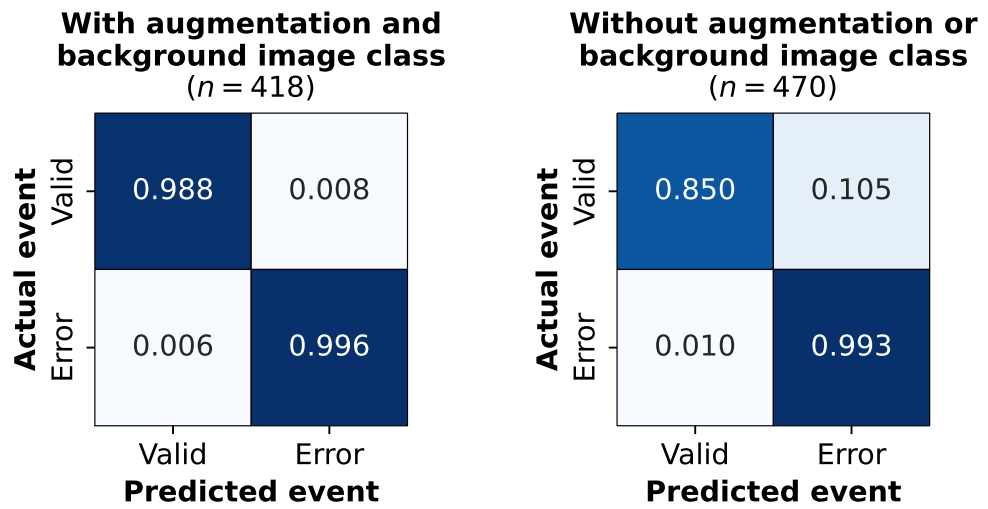

**Supplementary Figure 8 | Vial swap detection results across real-world operating room and controlled environment.** Confusion matrices **a**, with augmentation and a background image class and **b**, without augmentation or background image class.



**a Syringe classifier in held-out test OR with augmentation and background image class (n = 72)**

|                |           |               |          |                |               |           |           |             |               |          |            |            |             |   |   |   |   |   |   |
|----------------|-----------|---------------|----------|----------------|---------------|-----------|-----------|-------------|---------------|----------|------------|------------|-------------|---|---|---|---|---|---|
| Cefazolin      | 4         | 0             | 0        | 0              | 0             | 0         | 0         | 0           | 0             | 0        | 0          | 0          | 0           | 0 | 0 | 0 | 0 | 0 | 0 |
| Dexamethasone  | 0         | 8             | 0        | 0              | 0             | 0         | 0         | 0           | 0             | 0        | 0          | 0          | 0           | 0 | 0 | 0 | 0 | 0 | 0 |
| Fentanyl       | 0         | 0             | 12       | 0              | 0             | 0         | 0         | 0           | 0             | 0        | 0          | 0          | 0           | 0 | 0 | 0 | 0 | 0 | 0 |
| Glycopyrrolate | 0         | 0             | 0        | 0              | 0             | 0         | 0         | 0           | 0             | 0        | 0          | 0          | 0           | 0 | 0 | 0 | 0 | 0 | 0 |
| Hydromorphone  | 0         | 0             | 1        | 0              | 3             | 0         | 0         | 0           | 0             | 0        | 0          | 0          | 0           | 0 | 0 | 0 | 0 | 0 | 0 |
| Lidocaine      | 0         | 0             | 0        | 0              | 0             | 3         | 0         | 0           | 0             | 0        | 0          | 0          | 0           | 0 | 0 | 0 | 0 | 0 | 0 |
| Midazolam      | 0         | 0             | 0        | 0              | 0             | 0         | 5         | 0           | 0             | 0        | 0          | 0          | 0           | 0 | 0 | 0 | 0 | 0 | 0 |
| Ondansetron    | 0         | 0             | 0        | 0              | 0             | 0         | 0         | 8           | 0             | 0        | 0          | 0          | 0           | 0 | 0 | 0 | 0 | 0 | 0 |
| Phenylephrine  | 0         | 0             | 0        | 0              | 0             | 0         | 0         | 0           | 11            | 0        | 0          | 0          | 0           | 0 | 0 | 0 | 0 | 0 | 0 |
| Propofol       | 0         | 0             | 0        | 0              | 0             | 0         | 0         | 0           | 0             | 5        | 0          | 0          | 0           | 0 | 0 | 0 | 0 | 0 | 0 |
| Rocuronium     | 0         | 0             | 0        | 0              | 0             | 0         | 0         | 0           | 0             | 0        | 4          | 0          | 0           | 0 | 0 | 0 | 0 | 0 | 0 |
| Sugammadex     | 0         | 0             | 0        | 0              | 0             | 0         | 0         | 0           | 0             | 0        | 0          | 5          | 0           | 0 | 0 | 0 | 0 | 0 | 0 |
| Vasopressin    | 0         | 0             | 0        | 0              | 0             | 0         | 0         | 0           | 0             | 0        | 0          | 0          | 0           | 3 | 0 | 0 | 0 | 0 | 0 |
|                | Cefazolin | Dexamethasone | Fentanyl | Glycopyrrolate | Hydromorphone | Lidocaine | Midazolam | Ondansetron | Phenylephrine | Propofol | Rocuronium | Sugammadex | Vasopressin |   |   |   |   |   |   |

**b Syringe classifier in held-out test OR without augmentation or background image class (n = 72)**

|                |           |               |          |                |               |           |           |             |               |          |            |            |             |   |   |   |   |   |   |
|----------------|-----------|---------------|----------|----------------|---------------|-----------|-----------|-------------|---------------|----------|------------|------------|-------------|---|---|---|---|---|---|
| Cefazolin      | 4         | 0             | 0        | 0              | 0             | 0         | 0         | 0           | 0             | 0        | 0          | 0          | 0           | 0 | 0 | 0 | 0 | 0 | 0 |
| Dexamethasone  | 0         | 8             | 0        | 0              | 0             | 0         | 0         | 0           | 0             | 0        | 0          | 0          | 0           | 0 | 0 | 0 | 0 | 0 | 0 |
| Fentanyl       | 0         | 0             | 11       | 1              | 0             | 0         | 0         | 0           | 0             | 0        | 0          | 0          | 0           | 0 | 0 | 0 | 0 | 0 | 0 |
| Glycopyrrolate | 0         | 0             | 0        | 0              | 0             | 0         | 0         | 0           | 0             | 0        | 0          | 0          | 0           | 0 | 0 | 0 | 0 | 0 | 0 |
| Hydromorphone  | 0         | 0             | 0        | 0              | 4             | 0         | 0         | 0           | 0             | 0        | 0          | 0          | 0           | 0 | 0 | 0 | 0 | 0 | 0 |
| Lidocaine      | 0         | 0             | 0        | 0              | 0             | 3         | 0         | 0           | 0             | 0        | 0          | 0          | 0           | 0 | 0 | 0 | 0 | 0 | 0 |
| Midazolam      | 0         | 0             | 0        | 0              | 0             | 0         | 5         | 0           | 0             | 0        | 0          | 0          | 0           | 0 | 0 | 0 | 0 | 0 | 0 |
| Ondansetron    | 0         | 0             | 0        | 0              | 0             | 0         | 0         | 8           | 0             | 0        | 0          | 0          | 0           | 0 | 0 | 0 | 0 | 0 | 0 |
| Phenylephrine  | 0         | 0             | 0        | 0              | 0             | 0         | 0         | 0           | 11            | 0        | 0          | 0          | 0           | 0 | 0 | 0 | 0 | 0 | 0 |
| Propofol       | 0         | 0             | 0        | 0              | 0             | 0         | 0         | 0           | 0             | 5        | 0          | 0          | 0           | 0 | 0 | 0 | 0 | 0 | 0 |
| Rocuronium     | 0         | 0             | 0        | 0              | 0             | 0         | 0         | 0           | 0             | 0        | 4          | 0          | 0           | 0 | 0 | 0 | 0 | 0 | 0 |
| Sugammadex     | 0         | 0             | 0        | 0              | 0             | 0         | 0         | 0           | 0             | 0        | 0          | 5          | 0           | 0 | 0 | 0 | 0 | 0 | 0 |
| Vasopressin    | 0         | 0             | 0        | 0              | 0             | 0         | 0         | 0           | 0             | 0        | 0          | 0          | 1           | 0 | 0 | 2 | 0 | 0 | 0 |
|                | Cefazolin | Dexamethasone | Fentanyl | Glycopyrrolate | Hydromorphone | Lidocaine | Midazolam | Ondansetron | Phenylephrine | Propofol | Rocuronium | Sugammadex | Vasopressin |   |   |   |   |   |   |

**c Vial classifier in held-out test OR with augmentation and background image class (n = 24)**

|               |            |           |               |          |               |           |           |             |             |          |            |            |             |   |   |   |   |   |   |
|---------------|------------|-----------|---------------|----------|---------------|-----------|-----------|-------------|-------------|----------|------------|------------|-------------|---|---|---|---|---|---|
| Amiodarone    | 0          | 0         | 0             | 0        | 0             | 0         | 0         | 0           | 0           | 0        | 0          | 0          | 0           | 0 | 0 | 0 | 0 | 0 | 0 |
| Cefazolin     | 0          | 1         | 0             | 0        | 0             | 0         | 0         | 0           | 0           | 0        | 0          | 0          | 0           | 0 | 0 | 0 | 0 | 0 | 0 |
| Dexamethasone | 0          | 0         | 3             | 0        | 0             | 0         | 0         | 1           | 0           | 0        | 0          | 0          | 0           | 0 | 0 | 0 | 0 | 0 | 0 |
| Fentanyl      | 0          | 0         | 0             | 0        | 0             | 0         | 0         | 0           | 0           | 0        | 0          | 0          | 0           | 0 | 0 | 0 | 0 | 0 | 0 |
| Hydromorphone | 0          | 0         | 0             | 0        | 0             | 0         | 0         | 0           | 0           | 0        | 0          | 0          | 0           | 0 | 0 | 0 | 0 | 0 | 0 |
| Lidocaine     | 0          | 0         | 0             | 0        | 0             | 1         | 0         | 0           | 0           | 0        | 0          | 0          | 0           | 0 | 0 | 0 | 0 | 0 | 0 |
| Midazolam     | 0          | 0         | 0             | 0        | 0             | 0         | 6         | 0           | 0           | 0        | 0          | 0          | 0           | 0 | 0 | 0 | 0 | 0 | 0 |
| Neostigmine   | 0          | 0         | 0             | 0        | 0             | 0         | 0         | 0           | 0           | 0        | 0          | 0          | 0           | 0 | 0 | 0 | 0 | 0 | 0 |
| Ondansetron   | 0          | 0         | 0             | 0        | 0             | 0         | 0         | 0           | 4           | 0        | 0          | 0          | 0           | 0 | 0 | 0 | 0 | 0 | 0 |
| Propofol      | 0          | 0         | 0             | 0        | 0             | 0         | 0         | 0           | 0           | 4        | 0          | 0          | 0           | 0 | 0 | 0 | 0 | 0 | 0 |
| Rocuronium    | 0          | 0         | 0             | 0        | 0             | 0         | 0         | 0           | 0           | 0        | 1          | 0          | 0           | 0 | 0 | 0 | 0 | 0 | 0 |
| Sugammadex    | 0          | 0         | 0             | 0        | 0             | 0         | 0         | 0           | 0           | 0        | 0          | 3          | 0           | 0 | 0 | 0 | 0 | 0 | 0 |
| Vasopressin   | 0          | 0         | 0             | 0        | 0             | 0         | 0         | 0           | 0           | 0        | 0          | 0          | 0           | 0 | 0 | 0 | 0 | 0 | 0 |
|               | Amiodarone | Cefazolin | Dexamethasone | Fentanyl | Hydromorphone | Lidocaine | Midazolam | Neostigmine | Ondansetron | Propofol | Rocuronium | Sugammadex | Vasopressin |   |   |   |   |   |   |

**d Vial classifier in held-out test OR without augmentation or background image class (n = 32)**

|               |            |           |               |          |               |           |           |             |             |          |            |            |             |   |   |   |   |   |   |
|---------------|------------|-----------|---------------|----------|---------------|-----------|-----------|-------------|-------------|----------|------------|------------|-------------|---|---|---|---|---|---|
| Amiodarone    | 0          | 0         | 0             | 0        | 0             | 0         | 0         | 0           | 0           | 0        | 0          | 0          | 0           | 0 | 0 | 0 | 0 | 0 | 0 |
| Cefazolin     | 0          | 1         | 0             | 0        | 0             | 0         | 0         | 0           | 0           | 0        | 0          | 0          | 0           | 0 | 0 | 0 | 0 | 0 | 0 |
| Dexamethasone | 0          | 0         | 4             | 0        | 0             | 0         | 0         | 0           | 0           | 0        | 0          | 0          | 0           | 0 | 0 | 0 | 0 | 0 | 0 |
| Fentanyl      | 0          | 0         | 0             | 4        | 0             | 0         | 0         | 0           | 0           | 0        | 0          | 0          | 0           | 0 | 0 | 0 | 0 | 0 | 0 |
| Hydromorphone | 1          | 0         | 0             | 0        | 0             | 0         | 0         | 0           | 0           | 0        | 0          | 0          | 0           | 0 | 0 | 0 | 0 | 0 | 0 |
| Lidocaine     | 0          | 0         | 0             | 0        | 0             | 1         | 0         | 0           | 0           | 0        | 0          | 0          | 0           | 0 | 0 | 0 | 0 | 0 | 0 |
| Midazolam     | 0          | 0         | 0             | 0        | 0             | 0         | 6         | 0           | 0           | 0        | 0          | 0          | 0           | 0 | 0 | 0 | 0 | 0 | 0 |
| Neostigmine   | 0          | 0         | 0             | 0        | 0             | 0         | 0         | 0           | 0           | 0        | 0          | 0          | 0           | 0 | 0 | 0 | 0 | 0 | 0 |
| Ondansetron   | 0          | 0         | 0             | 0        | 0             | 0         | 0         | 0           | 4           | 0        | 0          | 0          | 0           | 0 | 0 | 0 | 0 | 0 | 0 |
| Propofol      | 0          | 0         | 0             | 0        | 0             | 0         | 0         | 0           | 0           | 4        | 0          | 0          | 0           | 0 | 0 | 0 | 0 | 0 | 0 |
| Rocuronium    | 0          | 1         | 0             | 0        | 0             | 0         | 0         | 0           | 0           | 0        | 1          | 0          | 0           | 0 | 0 | 0 | 0 | 0 | 0 |
| Sugammadex    | 0          | 0         | 0             | 0        | 0             | 0         | 0         | 1           | 0           | 0        | 0          | 3          | 0           | 0 | 0 | 0 | 0 | 0 | 0 |
| Vasopressin   | 0          | 0         | 0             | 0        | 0             | 0         | 0         | 0           | 0           | 0        | 0          | 0          | 0           | 0 | 0 | 0 | 1 | 0 | 0 |
|               | Amiodarone | Cefazolin | Dexamethasone | Fentanyl | Hydromorphone | Lidocaine | Midazolam | Neostigmine | Ondansetron | Propofol | Rocuronium | Sugammadex | Vasopressin |   |   |   |   |   |   |

**Supplementary Figure 9 | Generalization of drug label classifier performance to unseen hospital operating room environment.** Confusion matrix for **a, b** syringe labels with and without image augmentation and a background image class and **c, d** vial labels with and without image augmentation and a background image class.

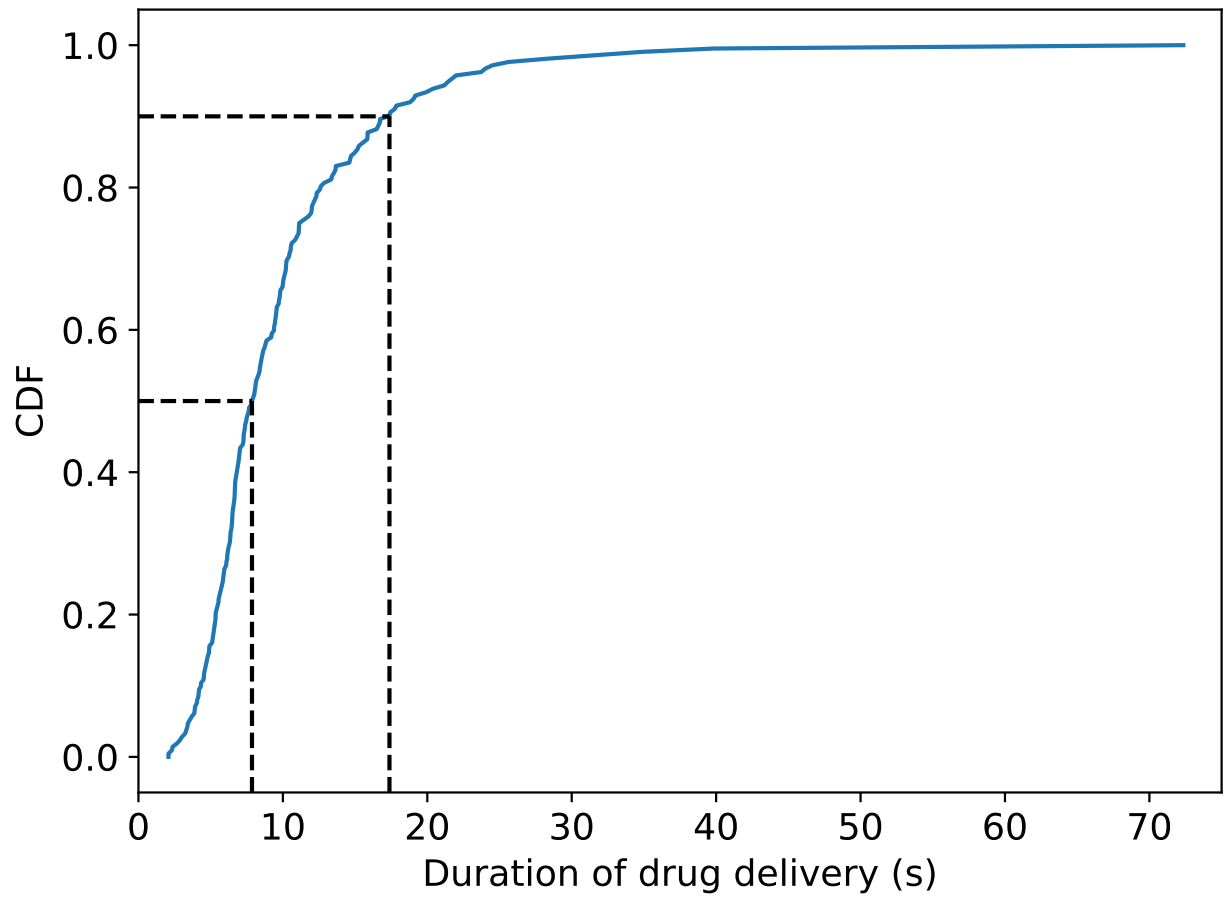

**Supplementary Figure 10 | Cumulative distribution function of drug delivery duration ( $n = 212$ ).** The duration is computed as the time between when the syringe with the drug is picked up and when it is delivered into the patient. Duration information is collected across drug delivery events spanning a seven month period.

| Drugs in training set     |                                    |                                      |                                            |
|---------------------------|------------------------------------|--------------------------------------|--------------------------------------------|
| Syringe drug label        | Drawup events<br>( <i>n</i> = 231) | Delivery events<br>( <i>n</i> = 481) | # training samples<br>( <i>n</i> = 10,180) |
| Cefazolin                 | 0                                  | 0                                    | 492                                        |
| Cisatracurium             | 0                                  | 0                                    | 360                                        |
| Dexamethasone             | 23                                 | 27                                   | 397                                        |
| Ephedrine                 | 0                                  | 55                                   | 396                                        |
| Epinephrine               | 0                                  | 0                                    | 343                                        |
| Etomidate                 | 0                                  | 4                                    | 430                                        |
| Fentanyl                  | 40                                 | 82                                   | 438                                        |
| Glycopyrrolate            | 3                                  | 23                                   | 469                                        |
| Hydromorphone             | 4                                  | 14                                   | 583                                        |
| Ketamine                  | 2                                  | 2                                    | 290                                        |
| Ketorolac                 | 0                                  | 8                                    | 341                                        |
| Lidocaine                 | 41                                 | 16                                   | 325                                        |
| Midazolam                 | 15                                 | 0                                    | 453                                        |
| Neostigmine               | 0                                  | 5                                    | 394                                        |
| Ondansetron               | 26                                 | 46                                   | 364                                        |
| Phenylephrine             | 0                                  | 58                                   | 525                                        |
| Propofol                  | 53                                 | 59                                   | 675                                        |
| Rocuronium                | 22                                 | 47                                   | 397                                        |
| Succinylcholine           | 0                                  | 3                                    | 284                                        |
| Sugammadex                | 2                                  | 22                                   | 439                                        |
| Vasopressin               | 0                                  | 8                                    | 318                                        |
| Vecuronium                | 0                                  | 2                                    | 429                                        |
| Background image          | -                                  | -                                    | 1,000                                      |
| Drugs not in training set |                                    |                                      |                                            |
| Syringe drug label        | Drawup events<br>( <i>n</i> = 0)   | Delivery events<br>( <i>n</i> = 4)   | # training samples<br>( <i>n</i> = 0)      |
| Esmolol                   | 0                                  | 3                                    | 0                                          |
| Labetolol                 | 0                                  | 1                                    | 0                                          |

**Supplementary Table 1: Distribution of syringe drug labels in real-world operating room dataset and classifier training dataset.** Number of drawup and delivery events, and number of training images for each syringe drug label.

| Drugs in training set |                                    |                                            |
|-----------------------|------------------------------------|--------------------------------------------|
| Vial drug label       | Drawup events<br>( <i>n</i> = 143) | # training samples<br>( <i>n</i> = 66,480) |
| Amiodarone            | 0                                  | 1,544                                      |
| Cefazolin             | 0                                  | 1,510                                      |
| Dexamethasone         | 11                                 | 2,978                                      |
| Etomidate             | 0                                  | 3,274                                      |
| Fentanyl              | 30                                 | 3,797                                      |
| Glycopyrrolate        | 4                                  | 774                                        |
| Hydromorphone         | 0                                  | 2,153                                      |
| Ketamine              | 1                                  | 2,688                                      |
| Ketorolac             | 0                                  | 4,549                                      |
| Lidocaine             | 21                                 | 3,662                                      |
| Magnesium Sulfate     | 0                                  | 1,018                                      |
| Metoprolol Tartrate   | 0                                  | 134                                        |
| Midazolam             | 7                                  | 2,148                                      |
| Neostigmine           | 0                                  | 5,974                                      |
| Ondansetron           | 22                                 | 2,708                                      |
| Propofol              | 30                                 | 2,260                                      |
| Rocuronium            | 15                                 | 2,894                                      |
| Sugammadex            | 2                                  | 199                                        |
| Vasopressin           | 0                                  | 3,376                                      |
| Vecuronium            | 0                                  | 7,489                                      |
| Background image      | -                                  | 11,317                                     |

**Supplementary Table 2: Distribution of vial drug labels in real-world operating room dataset and classifier training dataset.** Number of drawup events and number of training images for each vial drug label.

| Drug label      | Operating room | Controlled environment |
|-----------------|----------------|------------------------|
| Cefazolin       | 492            | 0                      |
| Cisatracurium   | 0              | 362                    |
| Dexamethasone   | 17             | 380                    |
| Ephedrine       | 88             | 308                    |
| Epinephrine     | 8              | 335                    |
| Etomidate       | 8              | 422                    |
| Fentanyl        | 98             | 340                    |
| Glycopyrrolate  | 140            | 329                    |
| Hydromorphone   | 81             | 502                    |
| Ketamine        | 4              | 286                    |
| Ketorolac       | 40             | 301                    |
| Lidocaine       | 29             | 296                    |
| Midazolam       | 78             | 375                    |
| Neostigmine     | 14             | 380                    |
| Ondansetron     | 27             | 337                    |
| Phenylephrine   | 43             | 482                    |
| Propofol        | 206            | 469                    |
| Rocuronium      | 99             | 298                    |
| Succinylcholine | 9              | 275                    |
| Sugammadex      | 87             | 352                    |
| Vasopressin     | 318            | 0                      |
| Vecuronium      | 0              | 429                    |

**Supplementary Table 3: Distribution of syringe classifier training dataset across evaluation environments.** Number of syringe label images between real-world operating room and the controlled environment for each syringe drug label in the dataset.

| Drug label        | Operating room | Controlled environment |
|-------------------|----------------|------------------------|
| Amiodarone        | 0              | 1,544                  |
| Cefazolin         | 1,510          | 0                      |
| Dexamethasone     | 521            | 2,457                  |
| Etomidate         | 740            | 2,534                  |
| Fentanyl          | 911            | 2,886                  |
| Glycopyrrolate    | 0              | 774                    |
| Hydromorphone     | 0              | 2,153                  |
| Ketamine          | 504            | 2,184                  |
| Ketorolac         | 0              | 4,549                  |
| Lidocaine         | 580            | 3,082                  |
| Magnesium Sulfate | 0              | 1,018                  |
| Midazolam         | 0              | 2,148                  |
| Neostigmine       | 316            | 5,658                  |
| Ondansetron       | 394            | 2,314                  |
| Propofol          | 270            | 1,990                  |
| Rocuronium        | 225            | 2,669                  |
| Vasopressin       | 0              | 3,376                  |
| Vecuronium        | 0              | 7,489                  |

**Supplementary Table 4: Distribution of vial classifier training dataset across evaluation environments.** Number of vial label images between real-world operating room and the controlled environment for each vial drug label in the dataset.



---

**Algorithm 1:** Algorithm to classify drug label on syringe or vial.

---

**Function** *drug\_label\_classifier* (*frames*, *drug\_label\_detector*,  
*drug\_label\_classifier*, *detection\_probability\_threshold*, *minimum\_prediction\_probability*,  
*minimum\_drug\_label\_frames*) :

**Input** : *frames* Extracted video frames  
**Input** : *drug\_label\_detector* Drug label detector for syringe or vial  
**Input** : *drug\_label\_classifier* Drug label classifier for syringe or vial  
**Input** : *detection\_probability\_threshold* Probability threshold for drug label detector  
**Input** : *minimum\_prediction\_probability* Probability threshold for drug label classifier  
**Input** : *minimum\_drug\_label\_frames* Minimum number of valid frames required to output a drug label prediction  
**Input** : *classnames* List of drug labels used by the classifier

**for** *frame*  $\in$  *frames* **do**

*detection\_probabilities*, *bounding\_boxes*  $\leftarrow$  *drug\_label\_detector*(*frame*)  
    *best\_detection\_probability\_index*  $\leftarrow$  *argmax*(*detection\_probabilities*)  
    *detection\_probability*  $\leftarrow$  *max*(*detection\_probabilities*)  
    *best\_bounding\_box*  $\leftarrow$  *bounding\_boxes*[*best\_detection\_probability\_index*]

**if** *best\_detection\_probability*  $>$  *detection\_probability\_threshold* **then**

*logits*  $\leftarrow$  *drug\_label\_classifier*(*best\_bounding\_box*)  
        *classifier\_probabilities*  $\leftarrow$  *softmax*(*logits*)  
        *prediction\_probability*  $\leftarrow$  *max*(*classifier\_probabilities*)  
        *prediction\_index*  $\leftarrow$  *argmax*(*classifier\_probabilities*)  
        *predicted\_class*  $\leftarrow$  *classnames*(*prediction\_index*)  
        *counter*  $\leftarrow$  {}

**if** *predicted\_class*  $\neq$  *background* **and**  
        *prediction\_probability*  $>$  *minimum\_prediction\_probability* **then**

**if** *predicted\_class*  $\in$  *dict* **then**  
                | *counter*[*predicted\_class*] += 1  
            **else**  
                | *counter*[*predicted\_class*]  $\leftarrow$  1

*most\_common\_class*  $\leftarrow$  *argmax*(*counter*)  
    *most\_common\_class\_frequency*  $\leftarrow$  *counter*[*most\_common\_class*]

**if** *most\_common\_class\_frequency*  $\geq$  *minimum\_drug\_label\_frames* **then**  
    | **return** *most\_common\_class*  
**return** *None*

---

---

**Algorithm 2:** Algorithm to compute vial swap errors

---

**Function** *detect\_vial\_swap* (*frames*, *syringe\_label\_detector*, *vial\_label\_detector*,  
*syringe\_label\_classifier*, *vial\_label\_classifier*) :

**Input** : *frames* Extracted video frames  
**Input** : *syringe\_label\_detector* Syringe label detector  
**Input** : *vial\_label\_detector* Vial label detector  
**Input** : *syringe\_label\_classifier* Syringe label classifier  
**Input** : *vial\_label\_classifier* Vial label classifier

*syringe\_detection\_probability\_threshold*  $\leftarrow$  0.85

*vial\_detection\_probability\_threshold*  $\leftarrow$  0.8

*minimum\_prediction\_probability*  $\leftarrow$  0.999

*minimum\_syringe\_frames*  $\leftarrow$  1

*minimum\_vial\_frames*  $\leftarrow$  6

*syringe\_label\_classification*  $\leftarrow$  *drug\_label\_classifier*(  
*frames*, *syringe\_label\_detector*, *syringe\_label\_classifier*,  
*syringe\_detection\_probability\_threshold*, *minimum\_prediction\_probability*,  
*minimum\_syringe\_frames*, *syringe\_classnames*)

*vial\_label\_classification*  $\leftarrow$  *drug\_label\_classifier*(  
*frames*, *vial\_label\_detector*, *vial\_label\_classifier*,  
*vial\_detection\_probability\_threshold*, *minimum\_prediction\_probability*,  
*minimum\_vial\_frames*, *vial\_classnames*)

**if** *syringe\_classification*  $\neq$  *None* and *vial\_classification*  $\neq$  *None* **then**

**if** *syringe\_classification* = *vial\_classification* **then**

        |     **return** *No error*

**else**

        |     **return** *Vial swap error*

**return** *Event not classified*

---
